# Supplementary material for: Thinking outside the box: placing hydrophilic particles in an oil phase for the formation and stabilization of Pickering emulsions
Source: PubMed Central journal article supplement — Chem Sci. 2018 Apr 27;9(21):4821–9. doi: 10.1039/c8sc00678d (PMC5982226; doi:10.1039/c8sc00678d), 2018-04-27
Supplement: SC-009-C8SC00678D-s001.pdf [file SC-009-C8SC00678D-s001.pdf]

Supporting information

## Thinking outside the Box: Placing Hydrophilic Particles in Oil Phase for Formation and stabilization of Pickering Emulsions

Paula Facal Marina, Jie Xu, Xuan Wu and Haolan Xu\*

Future Industries Institute, University of South Australia, Mawson Lakes Campus, Adelaide, SA 5095, Australia

### Synthesis of 200 nm silica nanoparticles

Spherical SiO<sub>2</sub> particles were prepared by hydrolyzing tetraethoxysilane in a water–ethanol mixture containing ammonia. The detailed recipe for SiO<sub>2</sub> particle is depicted in table 1.

**Table S1: Experimental details for the synthesis of 200 nm silica nanoparticles based on the Stöber method**

|                  | ml    | PM (g/mol) | ρ(g/ml) | g     | Moles     | Molar |
|------------------|-------|------------|---------|-------|-----------|-------|
| Ammonia 30%      | 3.38  | 17.03      | 0.880   | 2.97  | 0.052     | 0.5   |
| H <sub>2</sub> O | 5.91  | 18         |         | 5.91  | 0.33+1.12 | 4.5   |
| TEOS             | 3.91  | 208.33     | 0.933   | 3.65  | 0.017     | 0.17  |
| EtOH             | 86.80 | 46.07      | 0.789   | 68.49 | 1.49      |       |
| Total mL/g       | 100   |            |         | 81.02 |           |       |
| SiO <sub>2</sub> |       | 60.09      | 2.0     | 1.02  | 0.017     |       |

### Characterization

#### Calculation of number of particles, example for SiO<sub>2</sub> particles with 200

Without losing precursor material and resulting in SiO<sub>2</sub> particles with 200 nm in diameter. The number of particle can be calculated as follows:

The volume per sphere is,

$$V_{1NP} = \frac{4}{3}\pi r^3 \sim 4.19 \times 10^6 \text{ nm}^3$$

The mass per SiO<sub>2</sub> sphere,

$$m_{1NP} = \rho_{SiO_2} V_{1NP} \times 1 \times 10^{-21} \sim 8.38 \times 10^{-15} \text{ g}$$

Thus, the total number of particles dispersed in 100 ml is:

$$\frac{\text{total mass of nanoparticles}}{m_{1NP}} = \frac{1.02 \text{ g}}{8.38 \times 10^{-15} \text{ g}} = 1.22 \times 10^{14}$$

## Emulsification

**Table S2: Detailed experimental composition of each of the emulsion systems tested for long-term stability and emulsion type.**

|       | From aqueous dispersion |                    |                    | From HD dispersion |                   |                    |
|-------|-------------------------|--------------------|--------------------|--------------------|-------------------|--------------------|
|       | Aqueous phase           |                    | Oil phase          | Aqueous phase      | Oil phase         |                    |
| NPs % | NPs dispersion          | MQ water           |                    | MQ water           | NPs dispersion    | HD                 |
| 0     | 0 $\mu\text{L}$         | 2000 $\mu\text{L}$ | 2000 $\mu\text{L}$ | 2000 $\mu\text{L}$ | 0 $\mu\text{L}$   | 2000 $\mu\text{L}$ |
| 0.05  | 85 $\mu\text{L}$        | 1915 $\mu\text{L}$ | 2000 $\mu\text{L}$ | 2000 $\mu\text{L}$ | 71 $\mu\text{L}$  | 1929 $\mu\text{L}$ |
| 0.1   | 171 $\mu\text{L}$       | 1829 $\mu\text{L}$ | 2000 $\mu\text{L}$ | 2000 $\mu\text{L}$ | 142 $\mu\text{L}$ | 1858 $\mu\text{L}$ |
| 0.25  | 427 $\mu\text{L}$       | 1573 $\mu\text{L}$ | 2000 $\mu\text{L}$ | 2000 $\mu\text{L}$ | 355 $\mu\text{L}$ | 1645 $\mu\text{L}$ |
| 0.5   | 855 $\mu\text{L}$       | 1145 $\mu\text{L}$ | 2000 $\mu\text{L}$ | 2000 $\mu\text{L}$ | 709 $\mu\text{L}$ | 1291 $\mu\text{L}$ |

## Titration

For SiO<sub>2</sub> particles produced by the Stöber sol-gel method, the magnitude of the silanol group, that is, the number of OH groups per unit surface area is known as the Kiselev–Zhuravlev constant value. Hence, assuming that the SiO<sub>2</sub> surface is fully hydroxylated, that means it is not functionalized or there are no molecules adsorbed, it has a numerical value of 4.6 OH/nm<sup>2</sup> (least-squares method) (silanol number per unit surface).<sup>1</sup> To evaluate if the produced SiO<sub>2</sub> particles were hydroxylated to the maximum degree, we performed a potentiometric titration following a procedure reported by Fouilloux with slight modifications.<sup>2</sup> Accordingly, 9.52 ml of the SiO<sub>2</sub> particles dispersion (2.1 % wt., 5.4x10<sup>15</sup> NPs/mL) were mixed with 6.48 mL of sodium chloride solution (49.38 g L<sup>-1</sup>) giving a final volume of 16 mL. The estimated total surface area is 3.63x10<sup>19</sup> nm<sup>2</sup>. The titration was performed against 0.1 M HCl acid. After the addition of small volumes of HCl acid, the sample was allowed to equilibrate for at least 2 minutes.<sup>3</sup> The results of potentiometric titration showed a decrease of surface charge with decreasing pH, as expected. The volume of HCl required to lower the pH from 6.5 to 2.5 was recorded as 3.08 mL. In addition a blank titration with 16 mL of a sodium chloride solution without SiO<sub>2</sub> NPs was performed and the volume of 0.61 mL of HCl was subtracted from the previous one. It is calculated that the silanol density is 4.1 OH/nm<sup>2</sup>, which is close to the theoretical maximum value of 4.6 OH/nm<sup>2</sup> (note the adsorbed water on the surface of the SiO<sub>2</sub> particles may affect the results<sup>1</sup>). Therefore, it is unequivocal that the silanol groups from the SiO<sub>2</sub> particle surface are exposed and the SiO<sub>2</sub> particles are hydrophilic.

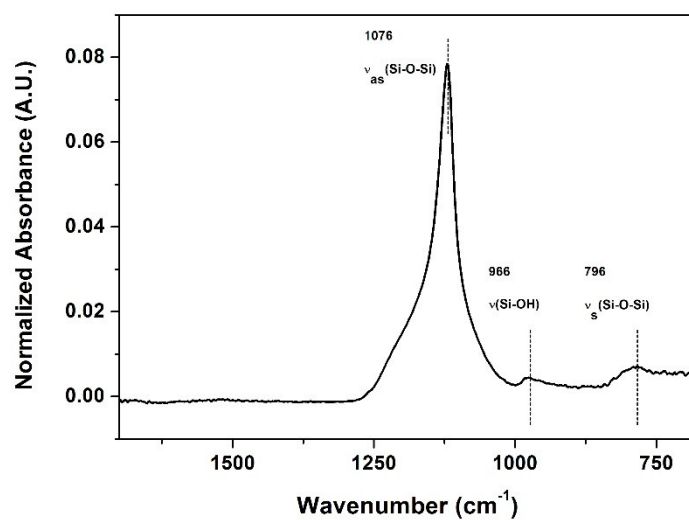

**Figure S1.** FTIR spectra of the SiO<sub>2</sub> particles prepared by Stöber sol-gel method. The spectrum shows the absorption bands arising from asymmetric vibration of Si–O (1076 cm<sup>-1</sup>), asymmetric vibration of Si–OH (966 cm<sup>-1</sup>), and symmetric vibration of Si–O (796 cm<sup>-1</sup>).<sup>4</sup>

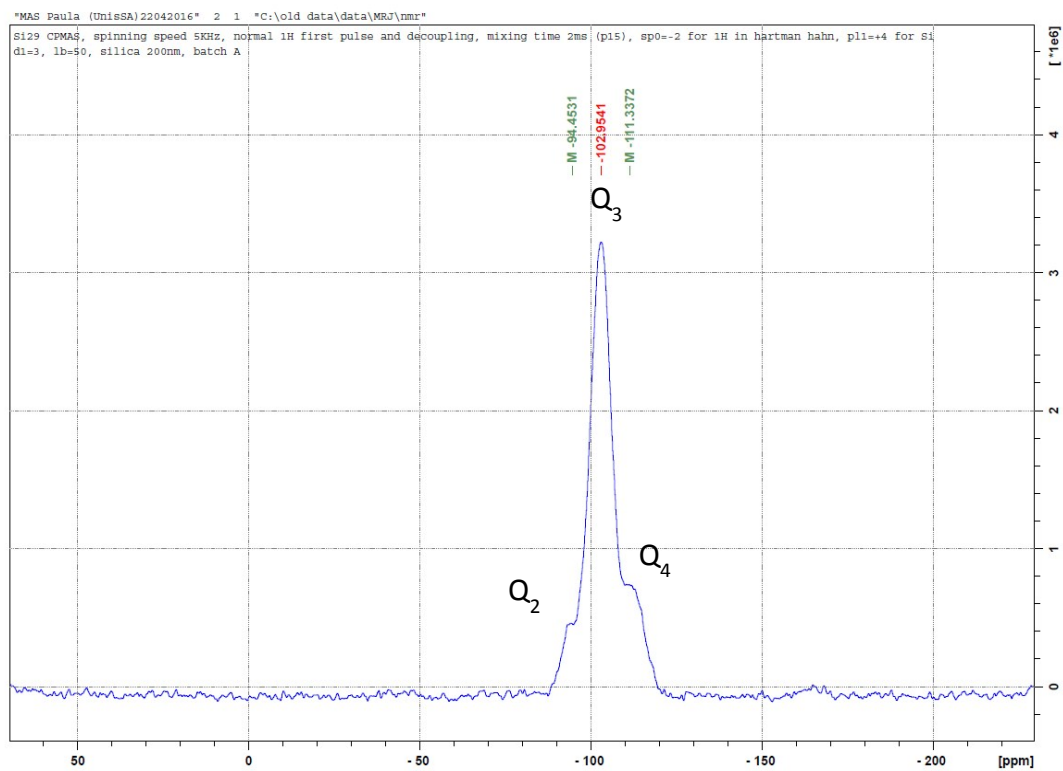

**Figure S2.**  $^{29}\text{Si}$  NMR spectrum of the  $\text{SiO}_2$  particles prepared by Stober sol-gel method.  $Q_2$  ( $\approx -92$  ppm) represents germinal Si-OH,  $Q_3$  ( $\approx -102$  ppm) isolated Si-OH and  $Q_4$  (109 ppm) the surficial silanol bridge.

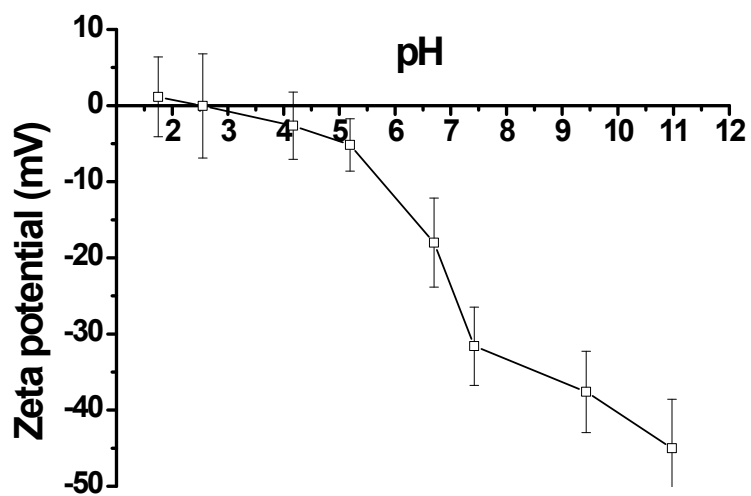

Figure S3. Zeta potential of 200 nm SiO<sub>2</sub> particles in function of pH

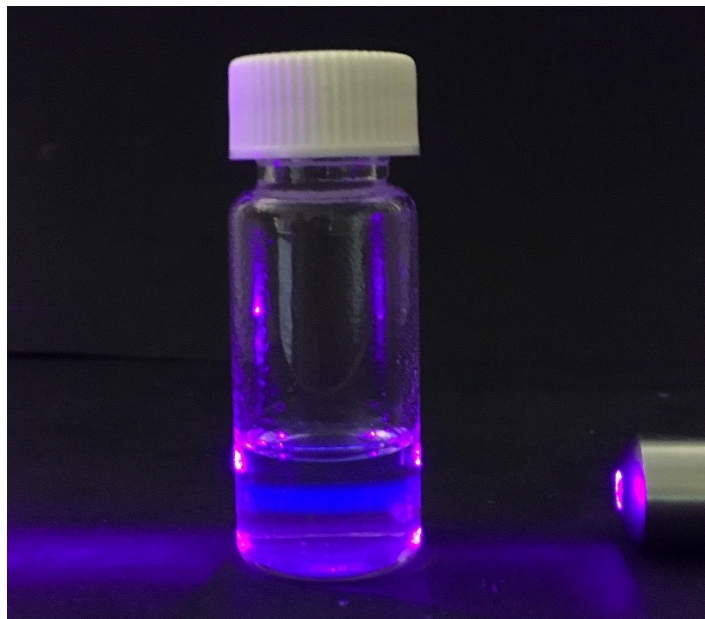

**Figure S4.** Digital photograph of the Tyndall effect of  $\text{SiO}_2$  particle (200 nm) dispersion in HD.

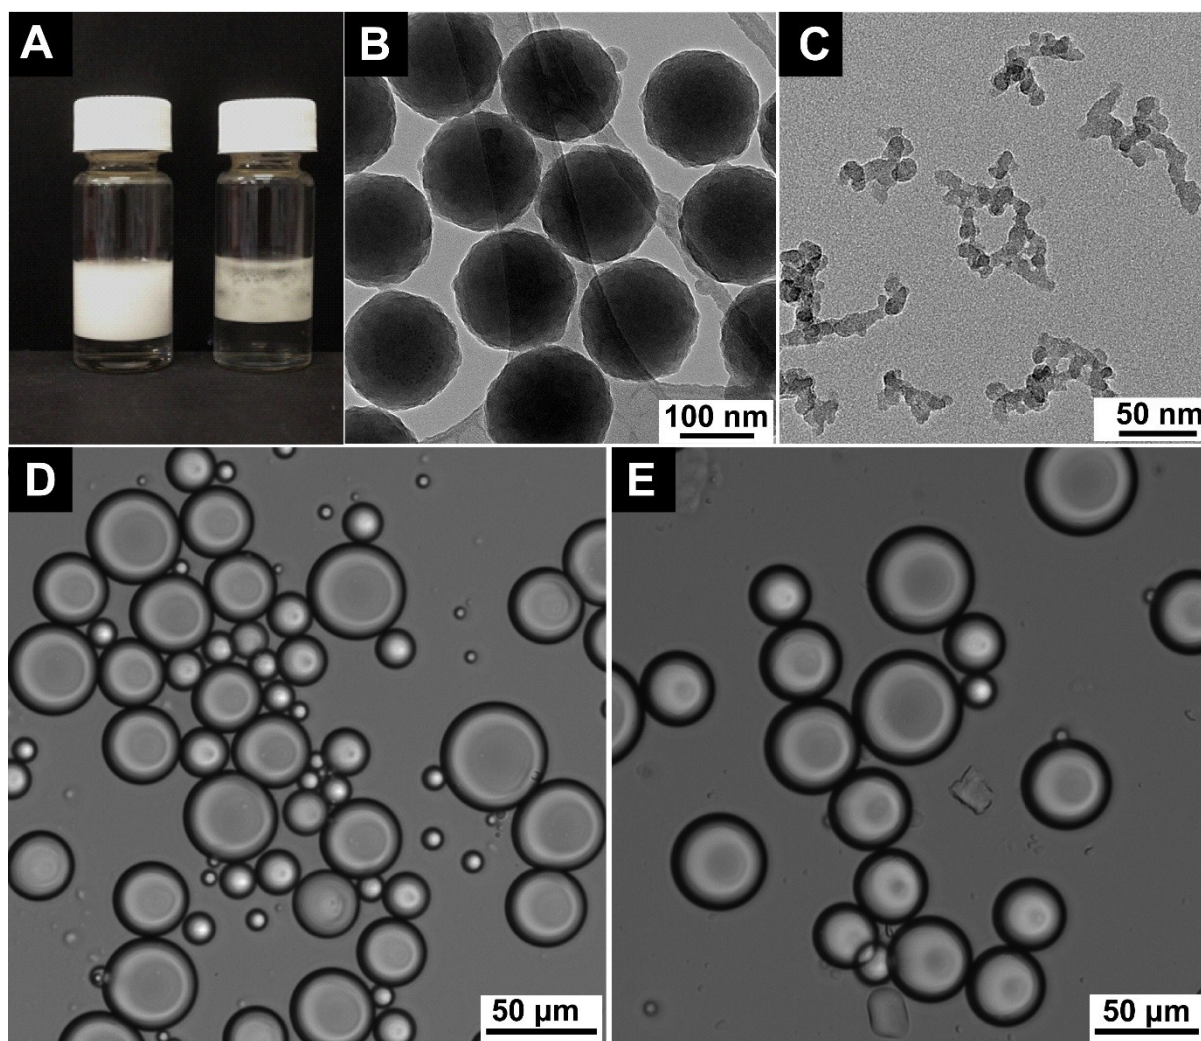

**Figure S5.** (A) Digital photograph illustrating oil-in-water Pickering emulsions obtained using 50% Milli-Q water and 50% HD containing commercial hydrophilic SiO<sub>2</sub> particles (left 160 nm and right 50-86 nm) as emulsifiers. TEM images of the commercial (B) SiO<sub>2</sub> particles with size of 160 nm (microParticles GmbH) and (C) Aerosil® SiO<sub>2</sub> aggregates (50-86 nm) composed of small 11 nm SiO<sub>2</sub> NPs. The corresponding optical microscopy images of the Pickering emulsions stabilized by (D) 160 nm SiO<sub>2</sub> particles and (E) 50-86 nm SiO<sub>2</sub> aggregates.



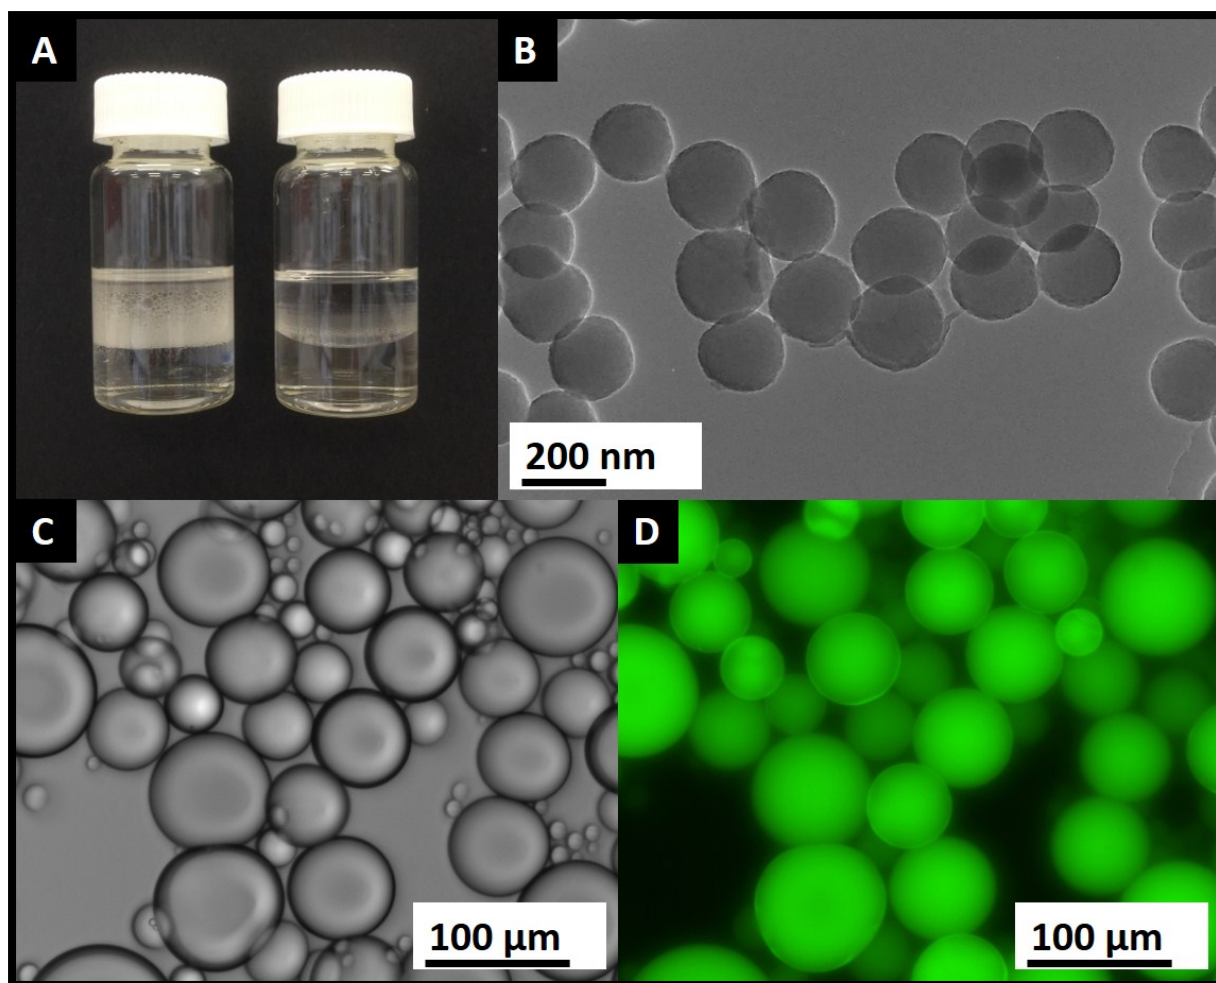

**Figure S6.** (A) Digital photograph illustrating (left) stable Pickering emulsions obtained when the hydrophilic PDA particles were initially dispersed in HD phase, (right) no Pickering emulsion was observed when the PDA particles were initially dispersed in the aqueous phase. (B) TEM image of the PDA particles. (C) Optical microscope image and (D) fluorescence microscope image of Pickering emulsion prepared when the PDA particles were initially dispersed in HD.

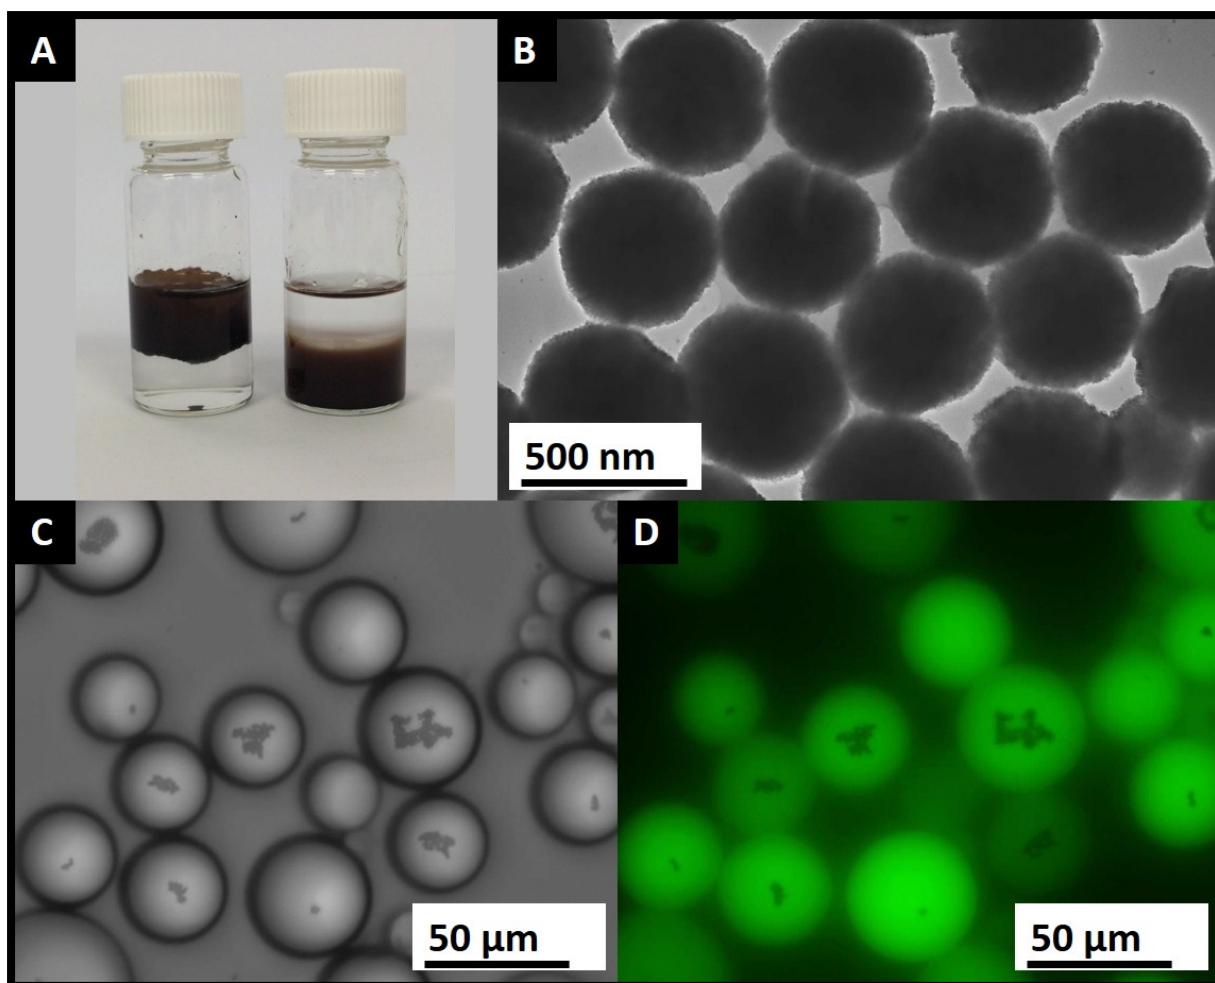

**Figure S7.** (A) Digital photograph illustrating (left) stable Pickering emulsions were obtained when the hydrophilic  $\text{Fe}_3\text{O}_4@\text{PAA}$  particles were originally dispersed in HD, (right) no Pickering emulsion was obtained when the  $\text{Fe}_3\text{O}_4@\text{PAA}$  particles were originally dispersed in the aqueous phase. (B) TEM image of the  $\text{Fe}_3\text{O}_4@\text{PAA}$  particles. (C) Optical microscope image and (D) fluorescence microscope image of Pickering emulsions.

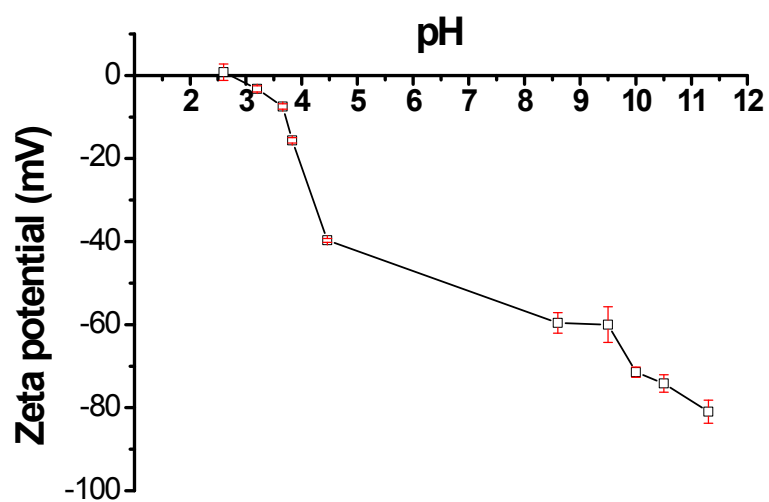

**Figure S8.** Zeta potential measurements of pristine HD droplets dispersed in degassed MQ water adjusted at different pH.

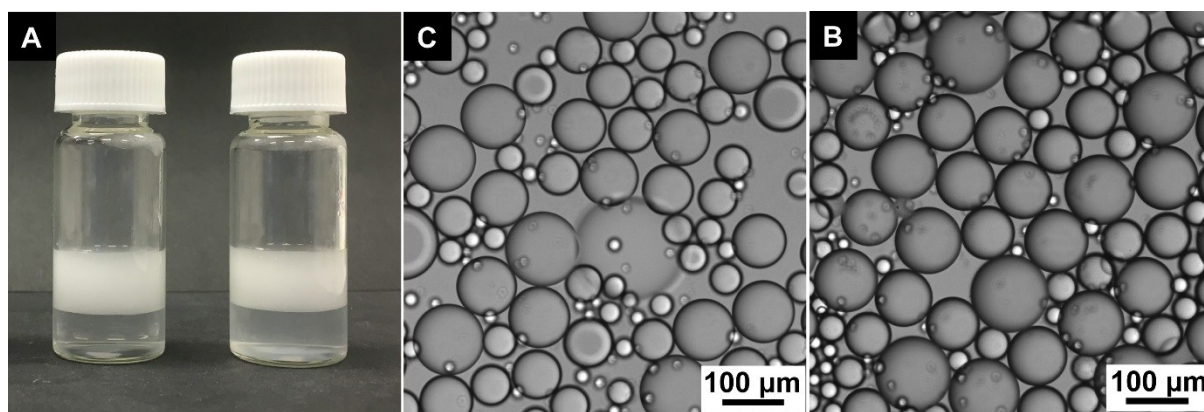

**Figure S9.** (A) Digital photograph of Pickering emulsions prepared using 50% Milli-Q water and 50% oil containing 200 nm SiO<sub>2</sub> particles, the oil phase is octane (left) and dodecane (right). Optical microscopy images of the Pickering emulsions prepared with (B) octane and (C) dodecane as oil phase.

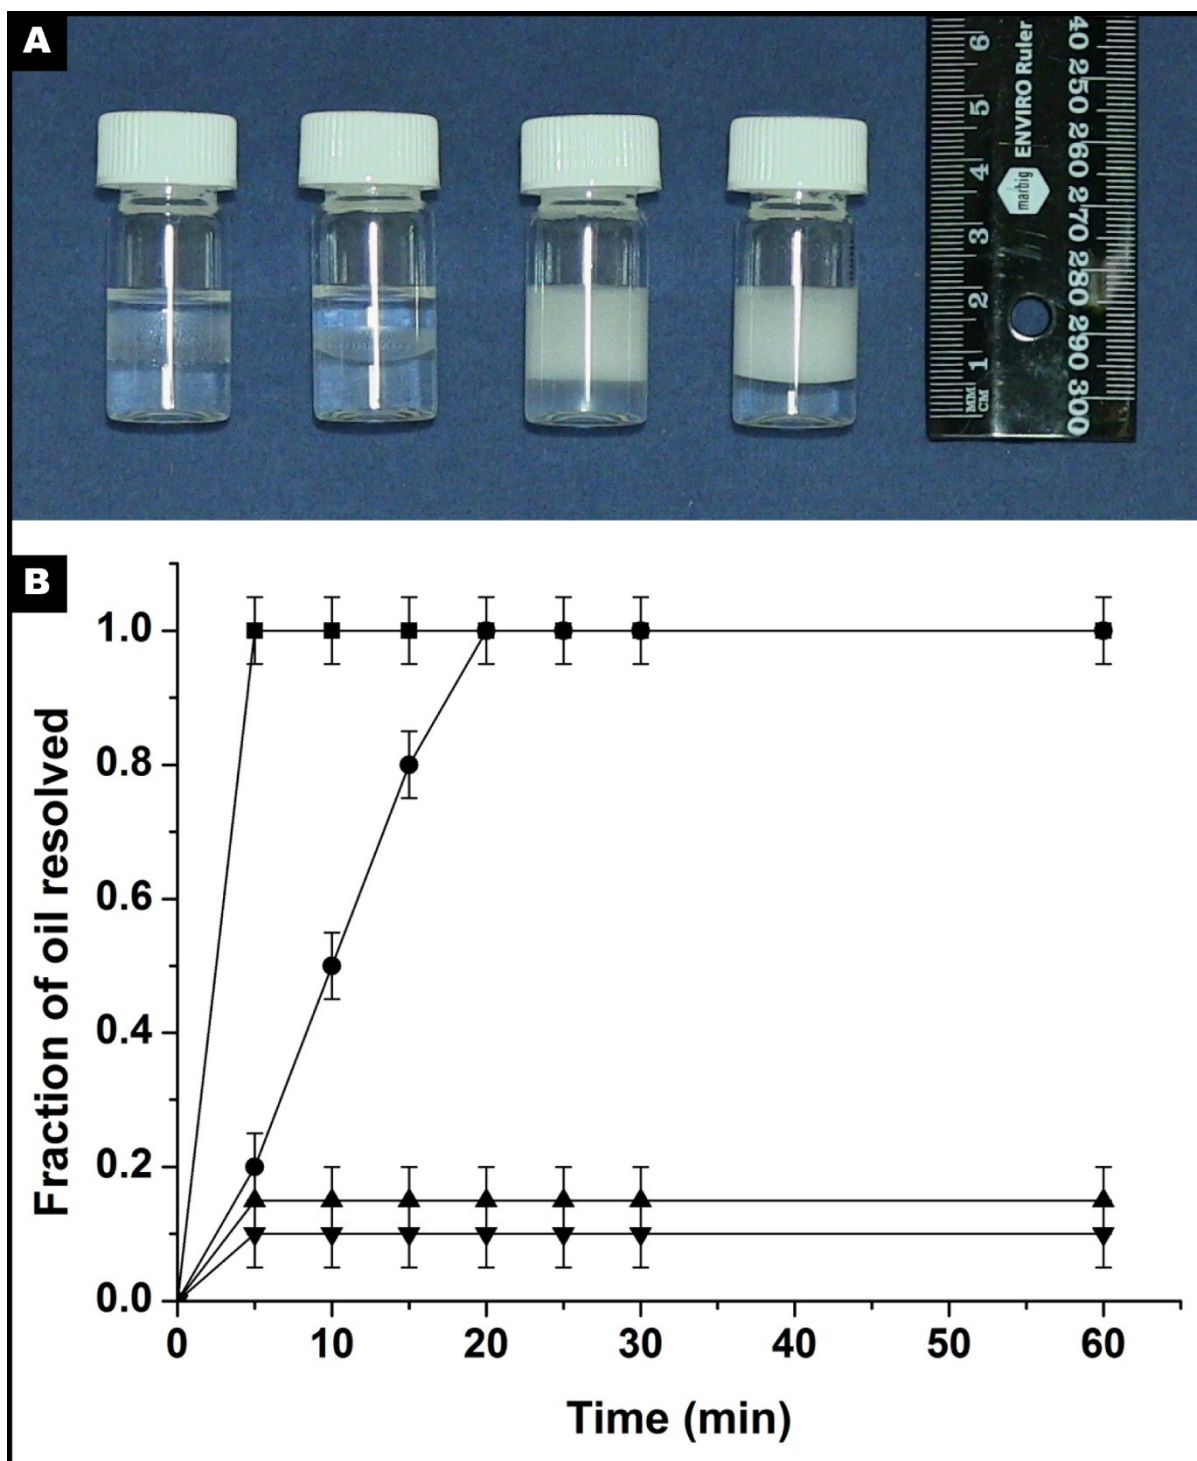

**Figure S10.** Stability of Pickering emulsions stabilized by hydrophilic SiO<sub>2</sub> particles (initially dispersed in water) at pH around the isoelectric point (pH = 2.5). (A) Concentration in percentage weight of SiO<sub>2</sub> particles from left to right 5.6, 11.2, 16.8, and 22.4 %. (B) Graphic displaying the fraction of oil resolved in function of time for each of the emulsion systems. ■ 5.6 wt%, ● 11.2 wt%, ▲ 16.2 wt%, ▼ 22.4 wt%.

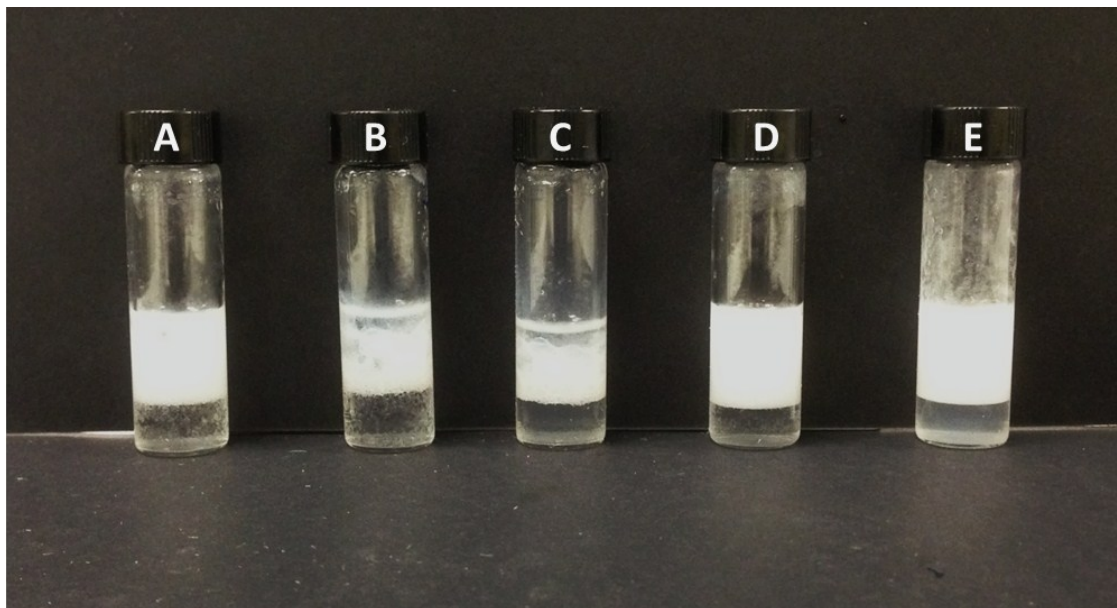

**Figure S11.** Photograph of the Pickering emulsions prepared when hydrophilic SiO<sub>2</sub> particles were originally dispersed in HD, the pH of water phase is (A) 2.86, (B) 3.83, (C) 6.10, (D) 8.40, (E) 10.45.

#### References

1. L. T. Zhuravlev, *Colloids Surf., A*, 2000, **173**, 1-38.
2. S. Fouilloux, F. Malloggi, J. Daillant and A. Thill, *Soft Matter*, 2016, **12**, 900-904.
3. J. Lützenkirchen, T. Preočanin, D. Kovačević, V. Tomišić, L. Lövgren and N. Kallay, *Croat. Chem. Acta*, 2012, **85**, 26.
4. S. L. Warring, D. A. Beattie and A. J. McQuillan, *Langmuir*, 2016, **32**, 1568-1576.
